# Supplementary material for: Two-dimensional graphitic carbon nitride nanosheets: a novel platform for flexible, robust and optically active triboelectric nanogenerators
Source: Royal Society of Chemistry journal article supplement (doi:10.1039/d0nr03879b), 2020-01-01
Supplement: d0nr03879b1.pdf [file d0nr03879b1.pdf]

## Supporting Information

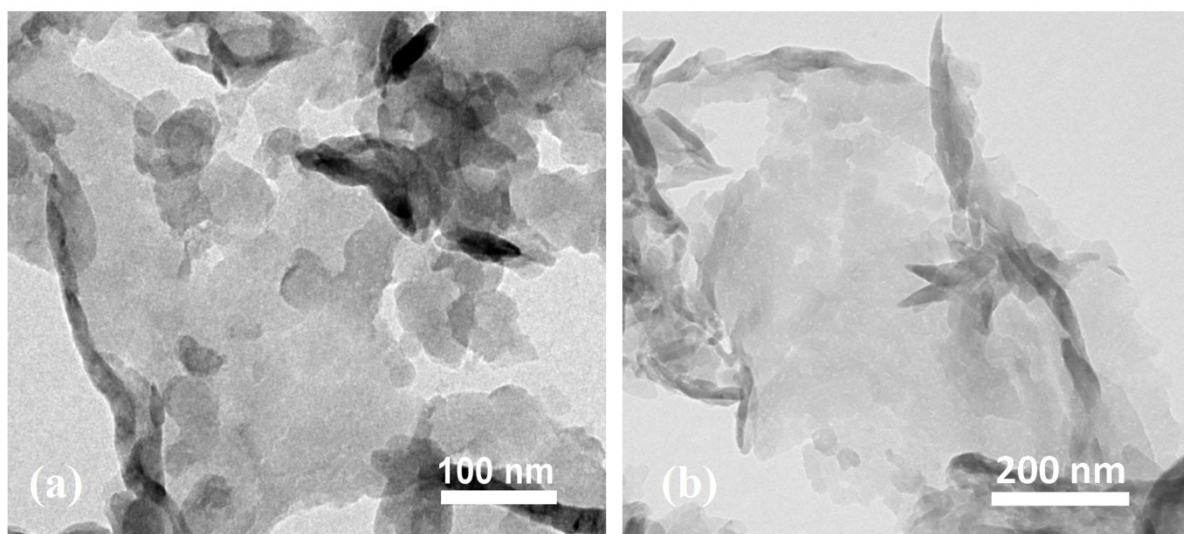

Figure S1: TEM images of g-C<sub>3</sub>N<sub>4</sub> nanosheets (a) pristine, (b) after annealing at 350 °C.

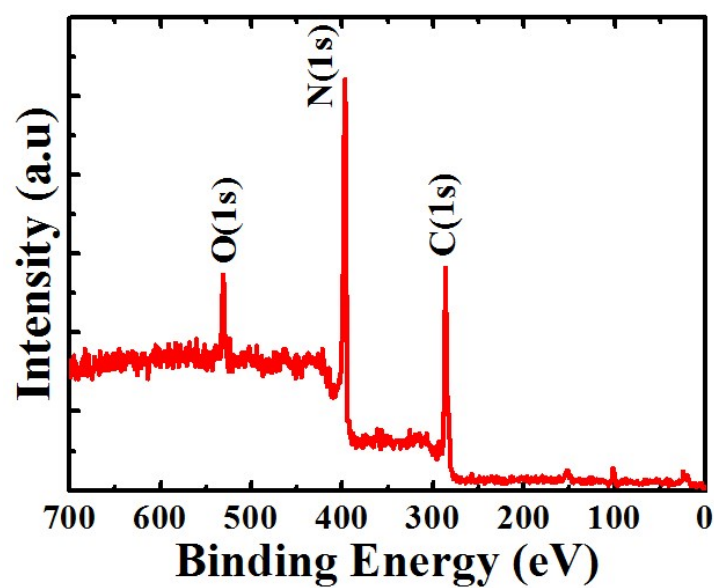

Figure S2: XPS survey spectrum of g-C<sub>3</sub>N<sub>4</sub> nanosheets.

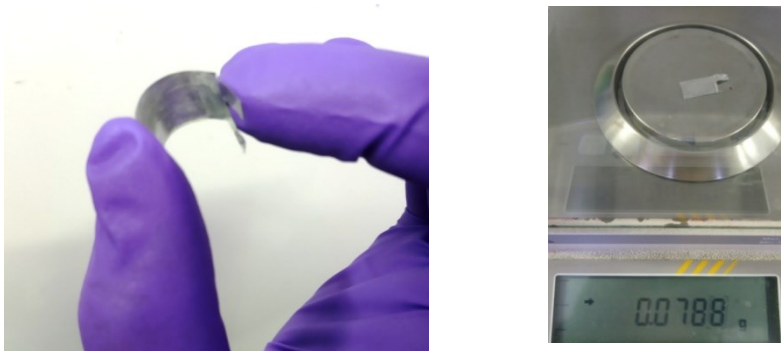

Figure S3: Photographs of a flexible TENG device in bent condition and placed under a weighing machine.

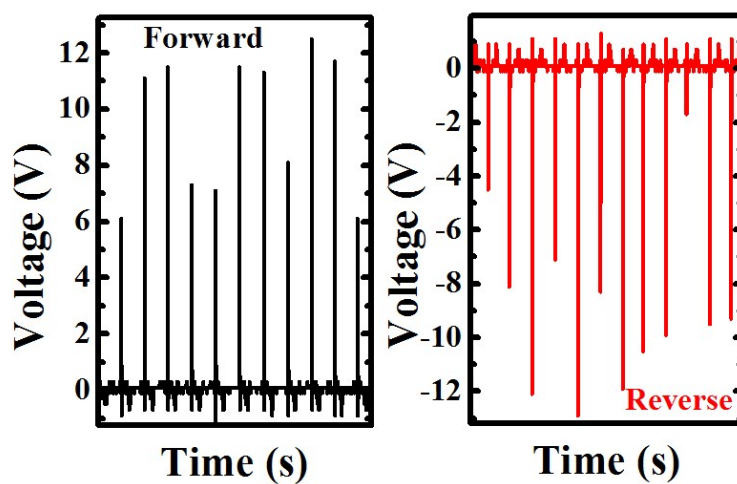

Figure S4: Nature of output voltage generated by the TENG upon changing the polarity.

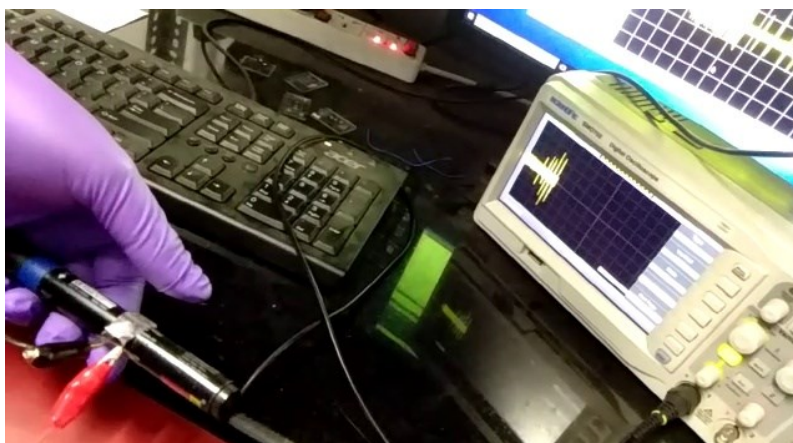

Figure S5: Photograph of output generation by touching a bent TENG.

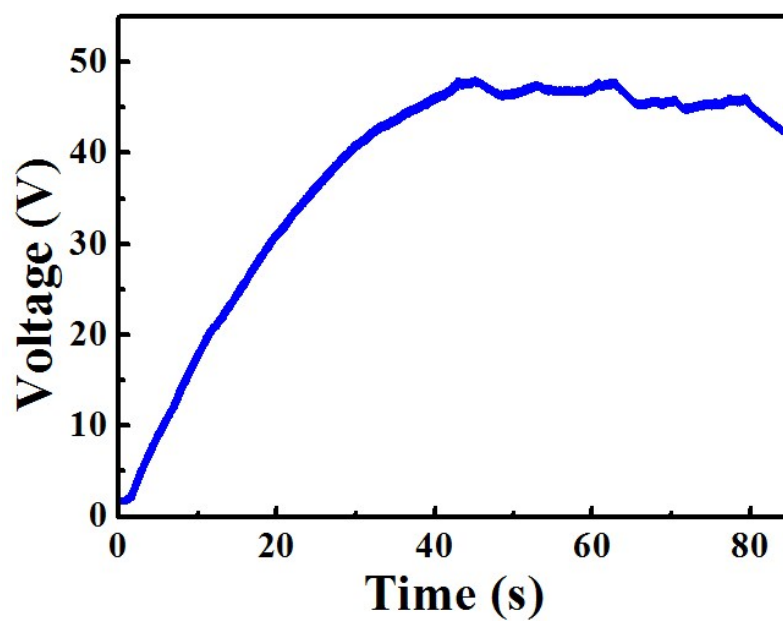

Figure S6: Charging characteristics of a capacitor ( $0.26\ \mu\text{F}$ ) by finger tapping on TENG subjected to water spraying experiment.

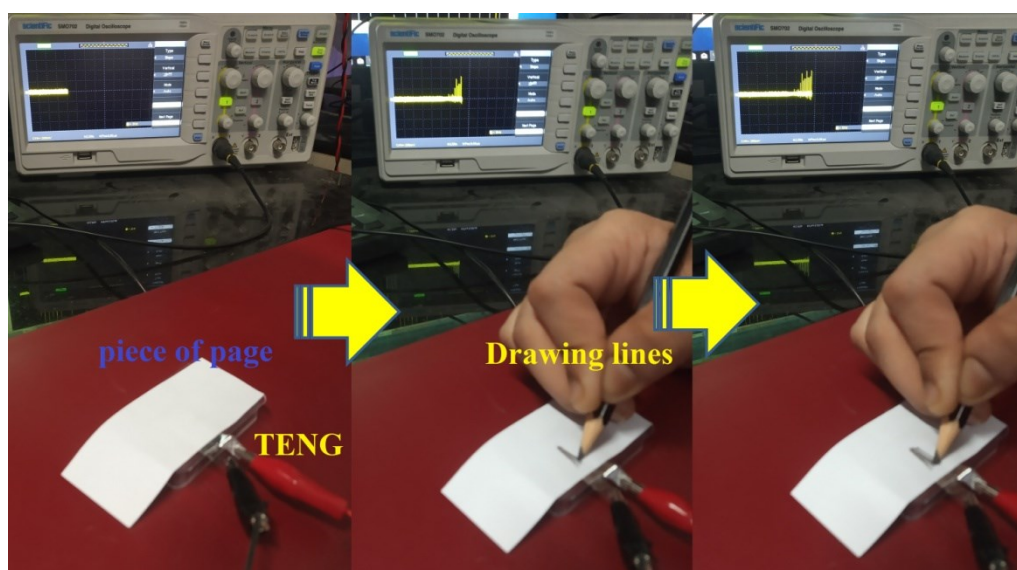

Figure S7: Photograph of output generation upon writing on a piece of paper placed over a TENG device.

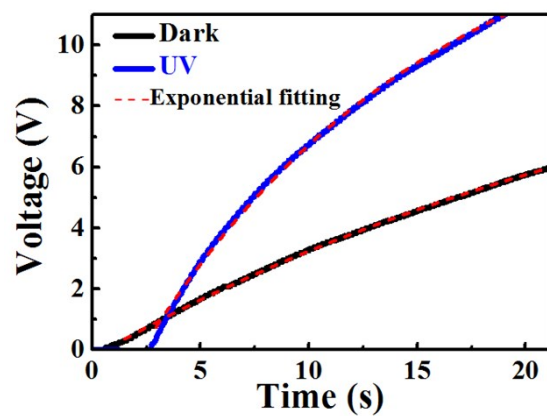

Figure S8: Charging dynamics of a capacitor (0.26 uF) by a TENG device using finger tapping under dark and UV illumination conditions.

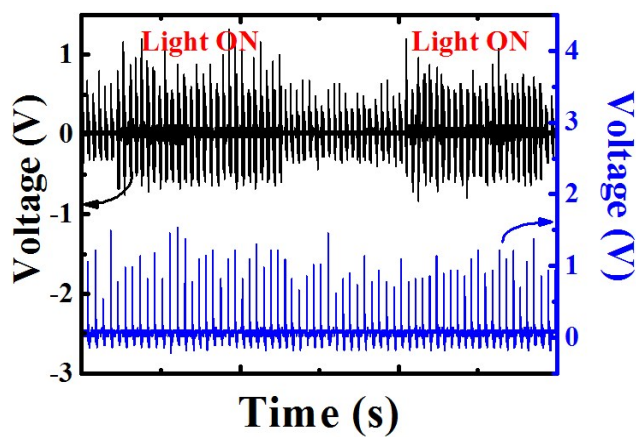

Figure S9: Output voltage generated by the TENG under UV (black) and violet (blue) light illumination.

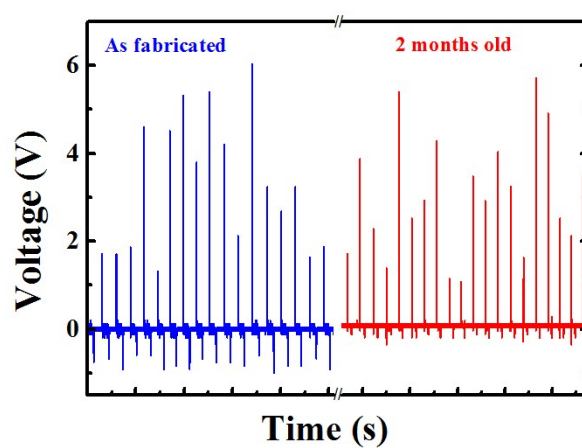

Figure S10: Output voltage generated by the as-fabricated and aged TENG devices.

Table S1: Comparison of performance of photo-induced TENG devices.

| <b>Triboelectric material</b>        | <b>Platform</b> | <b>Photo induced change in current/voltage (in %)</b> | <b>Responsivity</b> | <b>Reference</b> |
|--------------------------------------|-----------------|-------------------------------------------------------|---------------------|------------------|
| TiO <sub>2</sub>                     | Rigid           | -                                                     | ~ 280 A/W           | [28]             |
| MoS <sub>2</sub>                     | Rigid           | -                                                     | 727.87 A/W          | [40]             |
| PZT                                  | Rigid           | 90                                                    | 15 mA/W (Average)   | [41]             |
| MAPbI <sub>3</sub>                   | Rigid           | 37.5                                                  | 7.5 V/W (Average)   | [42]             |
| MAPbI <sub>x</sub> Cl <sub>3-x</sub> | Rigid           | 55.7                                                  | 10 <sup>4</sup> V/W | [26]             |
| g-C <sub>3</sub> N <sub>4</sub>      | Flexible        | 130                                                   | 117.1 V/W           | Present work     |
